# Supplementary material for: Mechano-covalent protection of coagulation factor VIII by von Willebrand factor
Source: PubMed Central journal article supplement — Blood Adv. 2022 Oct 18;7(10):2117–28. doi: 10.1182/bloodadvances.2022008650 (PMC10196764; doi:10.1182/bloodadvances.2022008650), 2022-10-18
Supplement: BLOODA_ADV-2022-008650-mmc1.pdf [file BLOODA_ADV-2022-008650-mmc1.pdf]

## SUPPLEMENTAL MATERIALS

### Mechano-covalent protection of coagulation factor VIII by von Willebrand factor

Diego Butera, Haoqing Jerry Wang, Heng-Giap Woon, Yunduo Charles Zhao, Lining Arnold Ju,  
Philip J. Hogg

**Table S1. VWF cysteine containing peptides analysed by HPLC and mass spectrometry.** Cysteine numbering is according to UniProt identifier P02671 for human VWF. The Cys residues of the disulfide that were measured are underlined in the peptide.

| Cys measured | Disulfide bond | Peptide                        |
|--------------|----------------|--------------------------------|
| 767          | 767-808        | SL <u>S</u> CRPPMVK            |
| 776          | 776-804        | LV <u>C</u> PADNLR             |
| 788          | 788-799        | AEGLE <u>C</u> TK              |
| 821          | 810-821        | <u>C</u> VALER                 |
| 827          | 792-827        | <u>C</u> PCFHQGK               |
| 829          | 829-851        | <u>C</u> PCFHQGK               |
| 914          | 914-921        | G <u>C</u> SHPSVK              |
| 1031         | 889-1031       | VSSQ <u>C</u> ADTR             |
| 1046         | 1046-1089      | KVPLDSSP <u>A</u> TCHNNIMK     |
| 1060         | 1060-1084      | QTMVDSS <u>C</u> R             |
| 1071         | 1071-1111      | ILTSDVFQ <u>D</u> CNK          |
| 1126         | 1101-1126      | TATL <u>C</u> PQSCEER          |
| 1130         | 1130-1173      | TATL <u>C</u> PQS <u>C</u> EER |

**Table S2. HPLC retention times of VWF peptides and <sup>12</sup>C-IPA- and <sup>13</sup>C-IPA-labelled peptide peak areas for the 13 healthy donor proteins.** Values for peptides containing a single Cys are listed. For peptides containing two Cys (CPCFHQGK and TATLCPQSCEER) we obtain 3 populations: one where both Cys are labelled with <sup>12</sup>C-IPA, one where both Cys are labeled with <sup>13</sup>C-IPA, and a mixed population where one Cys is labelled with <sup>12</sup>C-IPA and the other with <sup>13</sup>C-IPA at either position. The mixed populations have the same retention time and mass. To distinguish between them, we select fragments from MS2 that have unique mass signatures for one or the other. Since each mass has intensity values we compare the total intensities for both peptides and find their ratio.

| Sample          | Cysteine | Peptide                    | Retention time, min | <sup>12</sup> C-IPA peak area | <sup>13</sup> C-IPA peak area | Fraction Unformed |
|-----------------|----------|----------------------------|---------------------|-------------------------------|-------------------------------|-------------------|
| Healthy donor 1 | 767      | SLSCRPPMVK                 | 33.33               | 116236                        | 1534420                       | 0.07              |
|                 | 776      | LVCPADNLR                  | 37.55               | 2040829                       | 13835218                      | 0.129             |
|                 | 788      | AEGLECTK                   | 31.06               | 212652                        | 3920495                       | 0.051             |
|                 | 821      | CVALER                     | 33.54               | 248974                        | 4834228                       | 0.049             |
|                 | 914      | GCSHPSVK                   | 25.99               | 197480                        | 2886057                       | 0.064             |
|                 | 1031     | VSSQCADTR                  | 27.12               | 419503                        | 9221315                       | 0.044             |
|                 | 1046     | KVPLDSSP <u>A</u> TCHNNIMK | 32.18               | 319294                        | 3042286                       | 0.095             |
|                 | 1060     | QTMVDSS <u>C</u> R         | 30.53               | 234096                        | 2959111                       | 0.073             |
| Healthy donor 2 | 1071     | ILTSDVFQ <u>D</u> CNK      | 38.21               | 402641                        | 19749232                      | 0.02              |
|                 | 767      | SLSCRPPMVK                 | 33.41               | 87688                         | 1314023                       | 0.063             |
|                 | 776      | LVCPADNLR                  | 37.65               | 1779112                       | 10446320                      | 0.146             |
|                 | 788      | AEGLECTK                   | 31.13               | 209105                        | 3014212                       | 0.065             |
|                 | 821      | CVALER                     | 33.66               | 362001                        | 6249348                       | 0.055             |

|                 |      |                   |       |         |          |       |
|-----------------|------|-------------------|-------|---------|----------|-------|
|                 | 914  | GCSHPSVK          | 25.98 | 332702  | 2277522  | 0.127 |
|                 | 1031 | VSSQCADTR         | 27.10 | 407707  | 7771284  | 0.05  |
|                 | 1046 | KVPLDSSPATCHNNIMK | 32.30 | 340158  | 2846348  | 0.107 |
|                 | 1060 | QTMVDSSCR         | 30.61 | 263579  | 2391221  | 0.099 |
|                 | 1071 | ILTSDVFQDCNK      | 38.27 | 361947  | 14589928 | 0.024 |
| Healthy donor 3 | 767  | SLSCRPPMVK        | 33.46 | 163157  | 1250788  | 0.115 |
|                 | 776  | LVCPADNLR         | 37.73 | 1882305 | 8837055  | 0.176 |
|                 | 788  | AEGLECTK          | 31.17 | 389462  | 5687065  | 0.064 |
|                 | 821  | CVALER            | 33.67 | 379432  | 4590300  | 0.076 |
|                 | 914  | GCSHPSVK          | 26.02 | 197517  | 2126561  | 0.085 |
|                 | 1031 | VSSQCADTR         | 27.10 | 369175  | 7456970  | 0.047 |
|                 | 1046 | KVPLDSSPATCHNNIMK | 32.34 | 288945  | 2142992  | 0.119 |
|                 | 1060 | QTMVDSSCR         | 30.64 | 259043  | 2285694  | 0.102 |
|                 | 1071 | ILTSDVFQDCNK      | 38.35 | 310969  | 12097733 | 0.025 |
| Healthy donor 4 | 767  | SLSCRPPMVK        | 33.36 | 340360  | 2221409  | 0.133 |
|                 | 776  | LVCPADNLR         | 37.63 | 3068815 | 13526880 | 0.185 |
|                 | 788  | AEGLECTK          | 31.08 | 698928  | 9073087  | 0.072 |
|                 | 821  | CVALER            | 33.57 | 597456  | 5754159  | 0.094 |
|                 | 914  | GCSHPSVK          | 25.98 | 396112  | 3661863  | 0.098 |
|                 | 1031 | VSSQCADTR         | 27.08 | 910226  | 13906553 | 0.061 |
|                 | 1046 | KVPLDSSPATCHNNIMK | 32.23 | 653451  | 4106989  | 0.137 |
|                 | 1060 | QTMVDSSCR         | 30.54 | 629859  | 4178620  | 0.131 |
|                 | 1071 | ILTSDVFQDCNK      | 38.29 | 635590  | 18440844 | 0.033 |
| Healthy donor 5 | 767  | SLSCRPPMVK        | 33.28 | 86550   | 992951   | 0.08  |
|                 | 776  | LVCPADNLR         | 37.54 | 1525524 | 9598812  | 0.137 |
|                 | 788  | AEGLECTK          | 31.00 | 382411  | 6114311  | 0.059 |
|                 | 821  | CVALER            | 33.50 | 254038  | 4532524  | 0.053 |
|                 | 914  | GCSHPSVK          | 25.87 | 229000  | 2530689  | 0.083 |
|                 | 1031 | VSSQCADTR         | 26.99 | 514481  | 10243747 | 0.048 |
|                 | 1046 | KVPLDSSPATCHNNIMK | 32.15 | 375210  | 2183902  | 0.147 |
|                 | 1060 | QTMVDSSCR         | 30.47 | 223868  | 2222509  | 0.092 |
|                 | 1071 | ILTSDVFQDCNK      | 38.20 | 320643  | 14173705 | 0.022 |
| Healthy donor 6 | 767  | SLSCRPPMVK        | 33.27 | 103101  | 669516   | 0.133 |
|                 | 776  | LVCPADNLR         | 37.56 | 1776205 | 8720259  | 0.169 |
|                 | 788  | AEGLECTK          | 31.00 | 206338  | 2181213  | 0.086 |
|                 | 821  | CVALER            | 33.50 | 287556  | 3411665  | 0.078 |
|                 | 914  | GCSHPSVK          | 25.86 | 199123  | 1691560  | 0.105 |
|                 | 1031 | VSSQCADTR         | 27.02 | 443194  | 5845594  | 0.07  |
|                 | 1046 | KVPLDSSPATCHNNIMK | 32.11 | 374735  | 1898119  | 0.165 |
|                 | 1060 | QTMVDSSCR         | 30.50 | 278788  | 1632459  | 0.146 |
|                 | 1071 | ILTSDVFQDCNK      | 38.20 | 501475  | 12768986 | 0.038 |
| Healthy donor 7 | 767  | SLSCRPPMVK        | 33.38 | 248051  | 1799805  | 0.121 |
|                 | 776  | LVCPADNLR         | 37.63 | 2504011 | 12692088 | 0.165 |
|                 | 788  | AEGLECTK          | 31.11 | 240955  | 3906892  | 0.058 |
|                 | 821  | CVALER            | 33.60 | 510914  | 5930250  | 0.079 |
|                 | 914  | GCSHPSVK          | 26.02 | 359316  | 3019603  | 0.106 |
|                 | 1031 | VSSQCADTR         | 27.15 | 626932  | 11016803 | 0.054 |
|                 | 1046 | KVPLDSSPATCHNNIMK | 32.22 | 660170  | 3534738  | 0.157 |
|                 | 1060 | QTMVDSSCR         | 30.57 | 435995  | 3261724  | 0.118 |
|                 | 1071 | ILTSDVFQDCNK      | 38.29 | 491858  | 17129106 | 0.028 |
|                 | 767  | SLSCRPPMVK        | 33.27 | 270275  | 1859076  | 0.127 |
|                 | 776  | LVCPADNLR         | 37.54 | 4121855 | 19927312 | 0.171 |

|                  |      |                   |       |          |          |       |
|------------------|------|-------------------|-------|----------|----------|-------|
| Healthy donor 8  | 788  | AEGLECTK          | 31.02 | 350873   | 5202326  | 0.063 |
|                  | 821  | CVALER            | 33.49 | 706614   | 7830872  | 0.083 |
|                  | 914  | GCSHPSVK          | 25.96 | 479798   | 4187845  | 0.103 |
|                  | 1031 | VSSQCADTR         | 27.08 | 837375   | 16465369 | 0.048 |
|                  | 1046 | KVPLDSSPATCHNNIMK | 32.13 | 713149   | 4905737  | 0.127 |
|                  | 1060 | QTMVDSSCR         | 30.52 | 582551   | 4117727  | 0.124 |
|                  | 1071 | ILTSDVFQDCNK      | 38.18 | 1021248  | 26197340 | 0.038 |
| Healthy donor 9  | 767  | SLSCRPPMVK        | 34.56 | 158074   | 502964   | 0.239 |
|                  | 776  | LVCPADNLR         | 39.27 | 3335133  | 8718460  | 0.277 |
|                  | 788  | AEGLECTK          | 32.02 | 701928   | 5540963  | 0.112 |
|                  | 821  | CVALER            | 34.79 | 652926   | 3662864  | 0.151 |
|                  | 914  | GCSHPSVK          | 26.35 | 171624   | 949592   | 0.153 |
|                  | 1031 | VSSQCADTR         | 27.70 | 740645   | 8487754  | 0.08  |
|                  | 1046 | KVPLDSSPATCHNNIMK | 33.21 | 455936   | 884235   | 0.34  |
|                  | 1060 | QTMVDSSCR         | 31.44 | 862301   | 1909894  | 0.311 |
| Healthy donor 10 | 1071 | ILTSDVFQDCNK      | 39.89 | 544344   | 10659590 | 0.049 |
|                  | 767  | SLSCRPPMVK        | 35.07 | 347230   | 1075439  | 0.244 |
|                  | 776  | LVCPADNLR         | 39.78 | 2991781  | 7205544  | 0.293 |
|                  | 788  | AEGLECTK          | 32.37 | 316689   | 2297864  | 0.121 |
|                  | 821  | CVALER            | 35.21 | 501484   | 2295740  | 0.179 |
|                  | 914  | GCSHPSVK          | 26.66 | 171097   | 739990   | 0.188 |
|                  | 1031 | VSSQCADTR         | 27.95 | 921549   | 7997055  | 0.103 |
|                  | 1046 | KVPLDSSPATCHNNIMK | 33.60 | 638129   | 1567329  | 0.289 |
|                  | 1060 | QTMVDSSCR         | 31.76 | 1081924  | 3655520  | 0.228 |
| Healthy donor 11 | 1071 | ILTSDVFQDCNK      | 40.33 | 470047   | 9312739  | 0.048 |
|                  | 767  | SLSCRPPMVK        | 32.59 | 1652473  | 4966335  | 0.25  |
|                  | 776  | LVCPADNLR         | 36.63 | 11078342 | 25962422 | 0.299 |
|                  | 788  | AEGLECTK          | 30.31 | 3270600  | 21728042 | 0.131 |
|                  | 821  | CVALER            | 32.82 | 1798057  | 9257014  | 0.163 |
|                  | 914  | GCSHPSVK          | 25.35 | 1742347  | 8162783  | 0.176 |
|                  | 1031 | VSSQCADTR         | 26.61 | 3703688  | 31681901 | 0.105 |
|                  | 1046 | KVPLDSSPATCHNNIMK | 31.41 | 3027972  | 11170003 | 0.213 |
|                  | 1060 | QTMVDSSCR         | 29.80 | 1491445  | 6409002  | 0.189 |
| Healthy donor 12 | 1071 | ILTSDVFQDCNK      | 37.14 | 3037437  | 37695245 | 0.075 |
|                  | 767  | SLSCRPPMVK        | 32.49 | 1072188  | 3234180  | 0.249 |
|                  | 776  | LVCPADNLR         | 36.55 | 18281243 | 51537181 | 0.262 |
|                  | 788  | AEGLECTK          | 30.29 | 2592471  | 20076684 | 0.114 |
|                  | 821  | CVALER            | 32.82 | 1694643  | 11337080 | 0.13  |
|                  | 914  | GCSHPSVK          | 25.36 | 2317614  | 12194651 | 0.16  |
|                  | 1031 | VSSQCADTR         | 26.67 | 7395620  | 54170284 | 0.12  |
|                  | 1046 | KVPLDSSPATCHNNIMK | 31.32 | 3885421  | 15457825 | 0.201 |
|                  | 1060 | QTMVDSSCR         | 29.76 | 3227551  | 16938862 | 0.16  |
| Healthy donor 13 | 1071 | ILTSDVFQDCNK      | 37.12 | 3998533  | 50396829 | 0.074 |
|                  | 767  | SLSCRPPMVK        | 32.39 | 6335334  | 19520274 | 0.245 |
|                  | 776  | LVCPADNLR         | 36.61 | 25853353 | 52732538 | 0.329 |
|                  | 788  | AEGLECTK          | 30.14 | 5593052  | 30492252 | 0.155 |
|                  | 821  | CVALER            | 32.69 | 3061169  | 11740347 | 0.207 |
|                  | 914  | GCSHPSVK          | 25.32 | 3116553  | 12474461 | 0.2   |
|                  | 1031 | VSSQCADTR         | 26.65 | 8921426  | 61649772 | 0.126 |
|                  | 1046 | KVPLDSSPATCHNNIMK | 31.27 | 9342262  | 29465783 | 0.241 |
| Healthy donor 13 | 1060 | QTMVDSSCR         | 29.71 | 3668353  | 14521872 | 0.202 |
|                  | 1071 | ILTSDVFQDCNK      | 37.18 | 5570691  | 54260478 | 0.093 |

**Table S3. Redox states of the 7 male and 6 female VWF TIL'-TIL3 domain disulfide bonds.** Mean and SD and coefficient of variation is listed. Graphical representation of the experimental data shown in Fig. 1C.

| Disulfide bond | Male (n=7)<br>mean fraction<br>unformed $\pm$ SD | Male (n=7)<br>Coeff. of variation | Female (n=6)<br>mean fraction<br>unformed $\pm$ SD | Female (n=6)<br>Coeff. of variation |
|----------------|--------------------------------------------------|-----------------------------------|----------------------------------------------------|-------------------------------------|
| 767-808        | 0.176 $\pm$ 0.065                                | 37.0%                             | 0.139 $\pm$ 0.085                                  | 61.3%                               |
| 776-804        | 0.224 $\pm$ 0.069                                | 31.0%                             | 0.195 $\pm$ 0.075                                  | 38.2%                               |
| 788-799        | 0.095 $\pm$ 0.037                                | 38.7%                             | 0.082 $\pm$ 0.032                                  | 39.4%                               |
| 792-827        | 0.102 $\pm$ 0.049                                | 48.6%                             | 0.097 $\pm$ 0.061                                  | 63.0%                               |
| 810-821        | 0.119 $\pm$ 0.055                                | 45.9%                             | 0.094 $\pm$ 0.051                                  | 54.7%                               |
| 829-851        | 0.073 $\pm$ 0.039                                | 53.6%                             | 0.068 $\pm$ 0.036                                  | 52.5%                               |
| 889-1031       | 0.081 $\pm$ 0.035                                | 42.4%                             | 0.065 $\pm$ 0.024                                  | 36.7%                               |
| 914-921        | 0.135 $\pm$ 0.046                                | 34.2%                             | 0.117 $\pm$ 0.043                                  | 36.8%                               |
| 1046-1089      | 0.186 $\pm$ 0.062                                | 33.5%                             | 0.173 $\pm$ 0.092                                  | 52.9%                               |
| 1060-1084      | 0.154 $\pm$ 0.046                                | 30.0%                             | 0.149 $\pm$ 0.089                                  | 59.7%                               |
| 1071-1111      | 0.049 $\pm$ 0.025                                | 51.5%                             | 0.037 $\pm$ 0.021                                  | 56.9%                               |
| 1101-1126      | 0.079 $\pm$ 0.063                                | 80.3%                             | 0.074 $\pm$ 0.029                                  | 39.6%                               |
| 1130-1173      | 0.115 $\pm$ 0.040                                | 34.9%                             | 0.077 $\pm$ 0.046                                  | 59.6%                               |

**Table S4. Redox states of 3 healthy donor plasma VWF TIL'-TIL3 domain disulfide bonds (2 males, 1 female) when unbound or bound to FVIII.** Statistics of the results shown in Fig. 3A. Discovery determined using the two-stage linear step-up procedure of Benjamini, Krieger and Yekutieli, with Q = 1%. Each row was analyzed individually, without assuming a consistent SD.

| Disulfide bond | VWF<br>mean fraction<br>unformed | VWF-FVIII<br>mean fraction<br>unformed | Difference $\pm$ SE | P value  |
|----------------|----------------------------------|----------------------------------------|---------------------|----------|
| 767-808        | 0.2529                           | 0.1204                                 | 0.133 $\pm$ 0.010   | 0.000189 |
| 776-804        | 0.2964                           | 0.2017                                 | 0.095 $\pm$ 0.016   | 0.004405 |
| 788-799        | 0.1465                           | 0.07661                                | 0.070 $\pm$ 0.008   | 0.000739 |
| 792-827        | 0.1300                           | 0.08862                                | 0.041 $\pm$ 0.029   | 0.222709 |
| 810-821        | 0.1692                           | 0.07543                                | 0.094 $\pm$ 0.022   | 0.013360 |
| 829-851        | 0.09293                          | 0.03808                                | 0.055 $\pm$ 0.018   | 0.036858 |
| 889-1031       | 0.1367                           | 0.09197                                | 0.045 $\pm$ 0.003   | 0.000131 |
| 914-921        | 0.1769                           | 0.1186                                 | 0.058 $\pm$ 0.006   | 0.000535 |
| 1046-1089      | 0.2590                           | 0.1601                                 | 0.099 $\pm$ 0.008   | 0.000279 |
| 1060-1084      | 0.2206                           | 0.1048                                 | 0.116 $\pm$ 0.003   | 0.000002 |
| 1071-1111      | 0.08600                          | 0.03818                                | 0.048 $\pm$ 0.003   | 0.000044 |
| 1101-1126      | 0.09177                          | 0.04906                                | 0.043 $\pm$ 0.005   | 0.000997 |
| 1130-1173      | 0.2041                           | 0.1348                                 | 0.069 $\pm$ 0.011   | 0.003519 |

**Table S5. Heart failure (HF) and ECMO patient VWF and FVIII characteristics.** Normal ranges are indicated in brackets.

| <b>Patient</b> | <b>Factor VIII, % (50-150)</b> | <b>VWF Antigen, IU/dL (50-200)</b> | <b>VWF RCo, % (50-150)</b> | <b>VWF CBA, IU/dL (50-200)</b> | <b>VWF RCo/Antigen</b> | <b>VWF CBA/Antigen</b> | <b>Ultra-large VWF</b> |
|----------------|--------------------------------|------------------------------------|----------------------------|--------------------------------|------------------------|------------------------|------------------------|
| HF1            | 277                            | 246                                | 167                        | 171                            | 0.678862               | 0.695122               | Normal                 |
| HF2            | 324                            | 315                                | 202                        | 172                            | 0.64127                | 0.546032               | N/A                    |
| HF3            | 192                            | 164                                | 99                         | 107                            | 0.603659               | 0.652439               | Normal                 |
| HF4            | 133                            | 162                                | 94                         | 131                            | 0.580247               | 0.808642               | Normal                 |
| HF5            | 229                            | 332                                | 221                        | 189                            | 0.665663               | 0.569277               | Normal                 |
| ECMO1          | 308                            | 510                                | 226                        | 202                            | 0.443137               | 0.396078               | Loss                   |
| ECMO2          | 594                            | 513                                | 184                        | 155                            | 0.358674               | 0.302144               | Loss                   |
| ECMO3          | 316                            | 345                                | 219                        | 144                            | 0.634783               | 0.417391               | Loss                   |
| ECMO4          | 507                            | 592                                | 390                        | 155                            | 0.658784               | 0.261824               | Loss                   |
| ECMO5          | 383                            | 434                                | 346                        | 164                            | 0.797235               | 0.377880               | Loss                   |

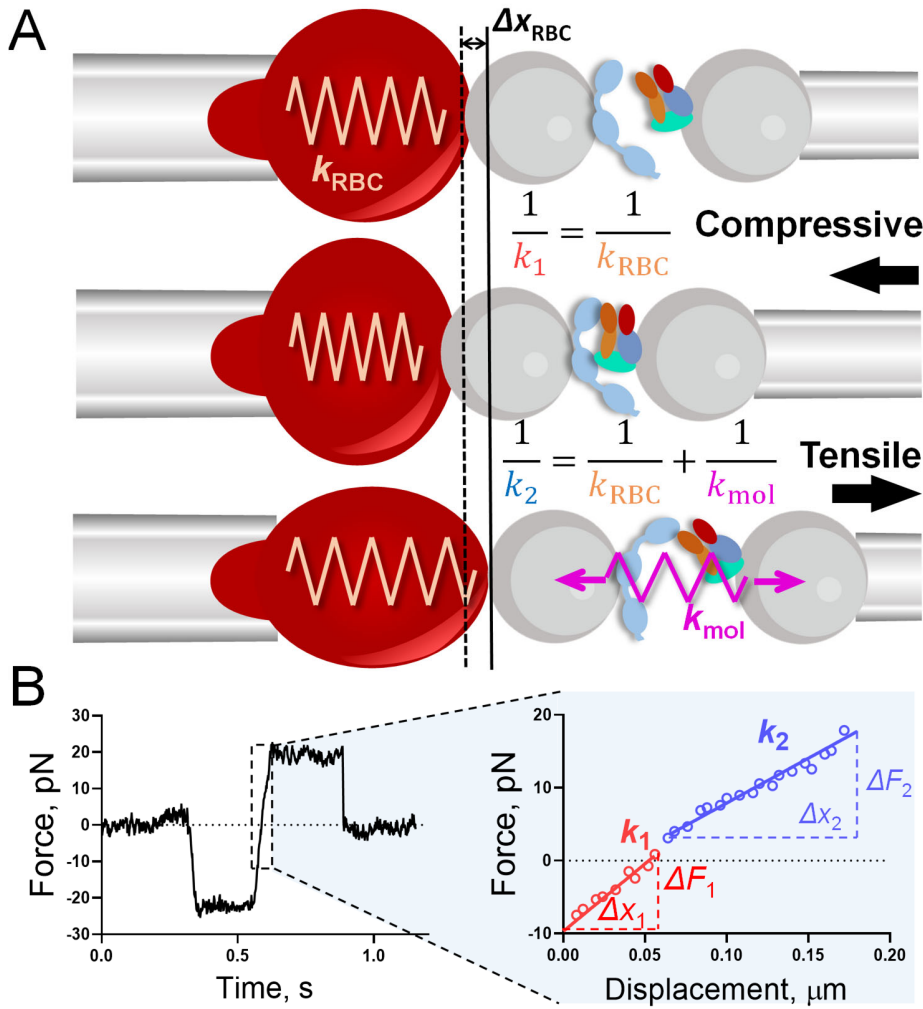

**Figure S1. Calculation of molecular spring constant,  $k_{mol}$ , for BFP assay.** **A.** Schematic of a BFP touch cycle. Based on Hooke's law, the compressive and tensile forces can be quantified by the product of the spring constant and displacement of the probe bead  $\Delta x_{RBC}$ . Notably, the molecular bond is not stretched during the compressive state, therefore  $k_{mol}$  is not considered. **B.** Deriving  $k_{mol}$  by converting Force vs. Time curve to Force vs. Displacement curve. *Left:* Representative force spectroscopy of a BFP bond touch cycle. *Right:* converted Force vs. Displacement curve during the retraction of the BFP cycle. Least-squares linear regression was employed to obtain  $k_1$  (red line) and  $k_2$  (blue line), respectively. The total spring constant during the compressive state ( $k_1$ ) is displayed as:

$$\frac{1}{k_1} = \frac{1}{k_{RBC}} \quad (1)$$

At the tensile stage, the total spring constant would remain as  $k_1$  until the molecular bond was formed and stretched. As a result, the spring constant at the tensile stage ( $k_2$ ) is represented as:

$$\frac{1}{k_2} = \frac{1}{k_{RBC}} + \frac{1}{k_{mol}} \quad (2)$$

To derive  $k_{mol}$ , the force spectroscopy of each bond event during retraction was converted into a Force vs. Displacement curve by multiplying the time by the actuation speed of the Target (i.e., 4,000 nm/s)<sup>1</sup>.

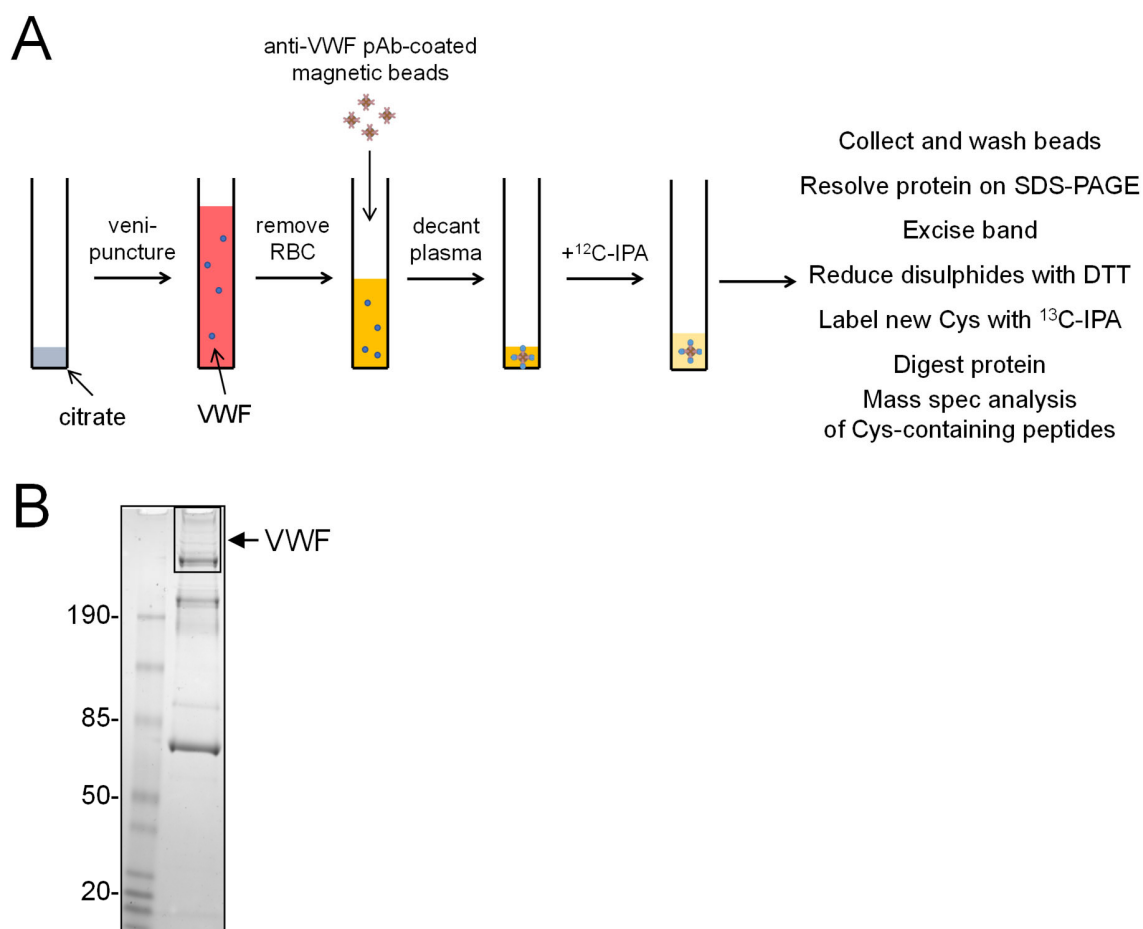

**Figure S2. Methods for measuring the redox state of VWF disulfide bonds.** **A.** Blood from healthy donors was drawn by venipuncture into citrate as anti-coagulant, plasma prepared by centrifugation and VWF collected on antibody-coated magnetic beads. The unpaired cysteine thiols in bead-bound VWF were alkylated with <sup>12</sup>C-IPA, the protein resolved on SDS-PAGE and the disulfide-bonded cysteine thiols alkylated with <sup>13</sup>C-IPA following reduction with DTT. The protein was digested with trypsin, 13 peptides (Table S1) encompassing cysteines representing 6 of the 8 disulfide bonds in the VWF TIL' and E' domains and 7 of the 14 disulfide bonds in the D3 through TIL3 domains were analyzed by HPLC and mass spectrometry and the redox state of the disulfides quantified. **B.** Example of <sup>12</sup>C-IPA-labelled VWF resolved on SDS-PAGE. All multimer forms of VWF were excised from the gel (indicated by the box) and processed for disulfide bond redox state. For reference, the VWF dimer has a molecular mass of 500 kDa. Molecular mass standards are shown in the left-hand lane.

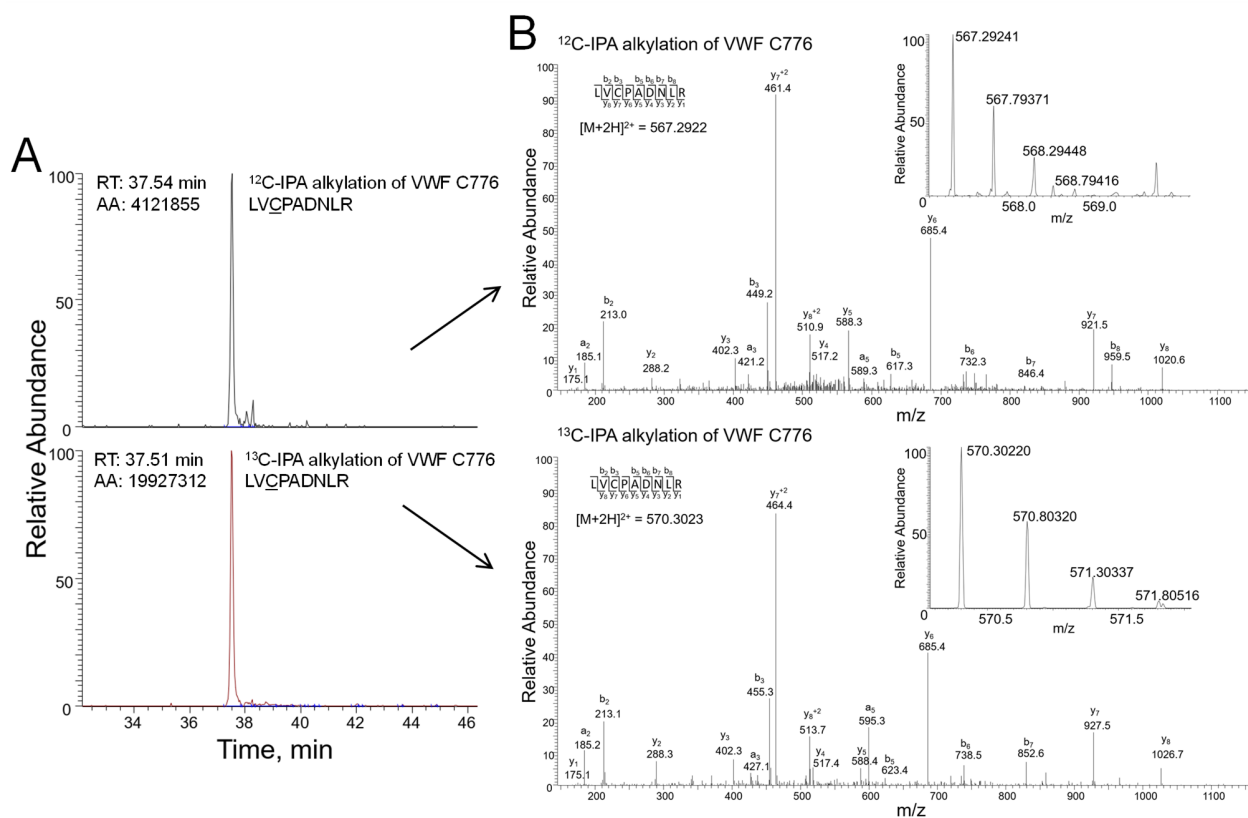

**Figure S3. Differential cysteine alkylation of the VWF C776 residue and peptide analysis.** **A.** HPLC resolution of the LVCPADNLR peptide containing C776 labelled with either <sup>12</sup>C-IPA (upper trace) or <sup>13</sup>C-IPA (lower trace). **B.** Representative tandem mass spectra of the LVCPADNLR peptide. The upper and lower traces are examples of <sup>12</sup>C-IPA or <sup>13</sup>C-IPA alkylation of C776, respectively. The accurate mass spectrum of the peptide is shown in the insets (upper trace, observed  $[M+2H]^{2+} = 567.2924$  m/z and expected  $[M+2H]^{2+} = 567.2922$  m/z; lower trace, observed  $[M+2H]^{3+} = 570.3022$  m/z and expected  $[M+2H]^{3+} = 570.3023$  m/z).



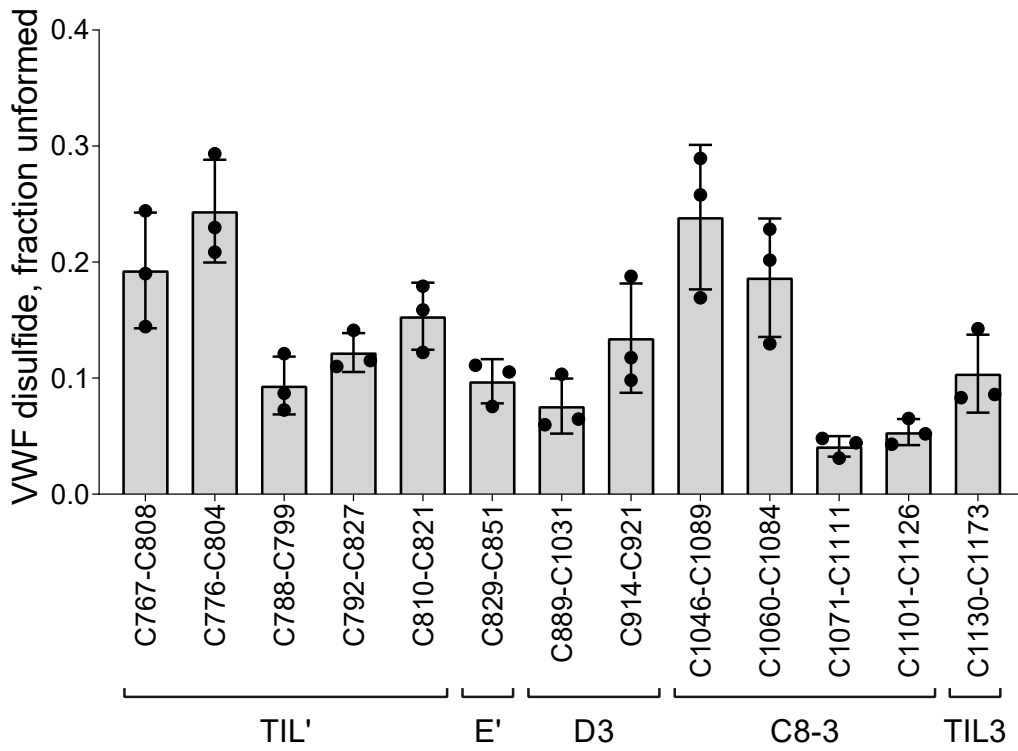

**Figure S4. Inter-assay variation in redox states of the VWF TIL'-TIL3 domain disulfide bonds.** A single plasma sample (32 year old male) was assayed on three separate occasions. The average coefficient of variation for the 13 disulfides was 26.4%.

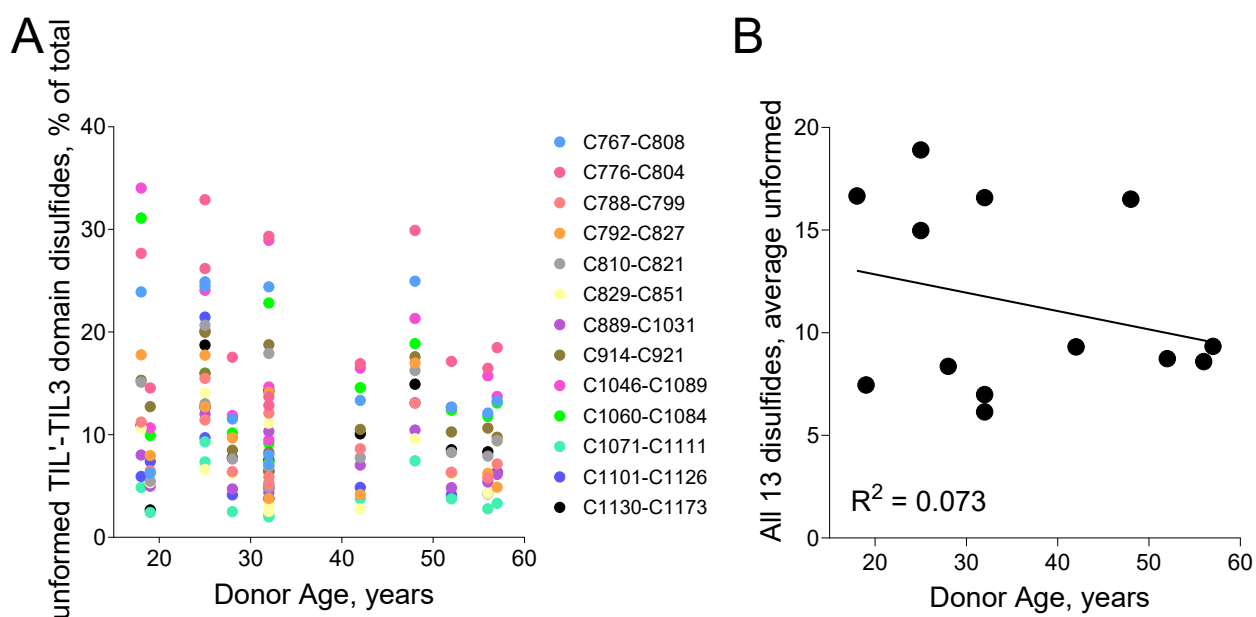

**Figure S5. Age dependence in redox states of the VWF TIL'-TIL3 domain disulfide bonds. A.** Redox states of the 13 TIL-TIL3 disulfides in 13 healthy human donors expressed as a function of donor age (18-57 years old). **B.** Correlation of average redox state of the 13 disulfides as a function of donor age. The solid line is the linear least-squares fit of the data, which is not significantly non-zero.

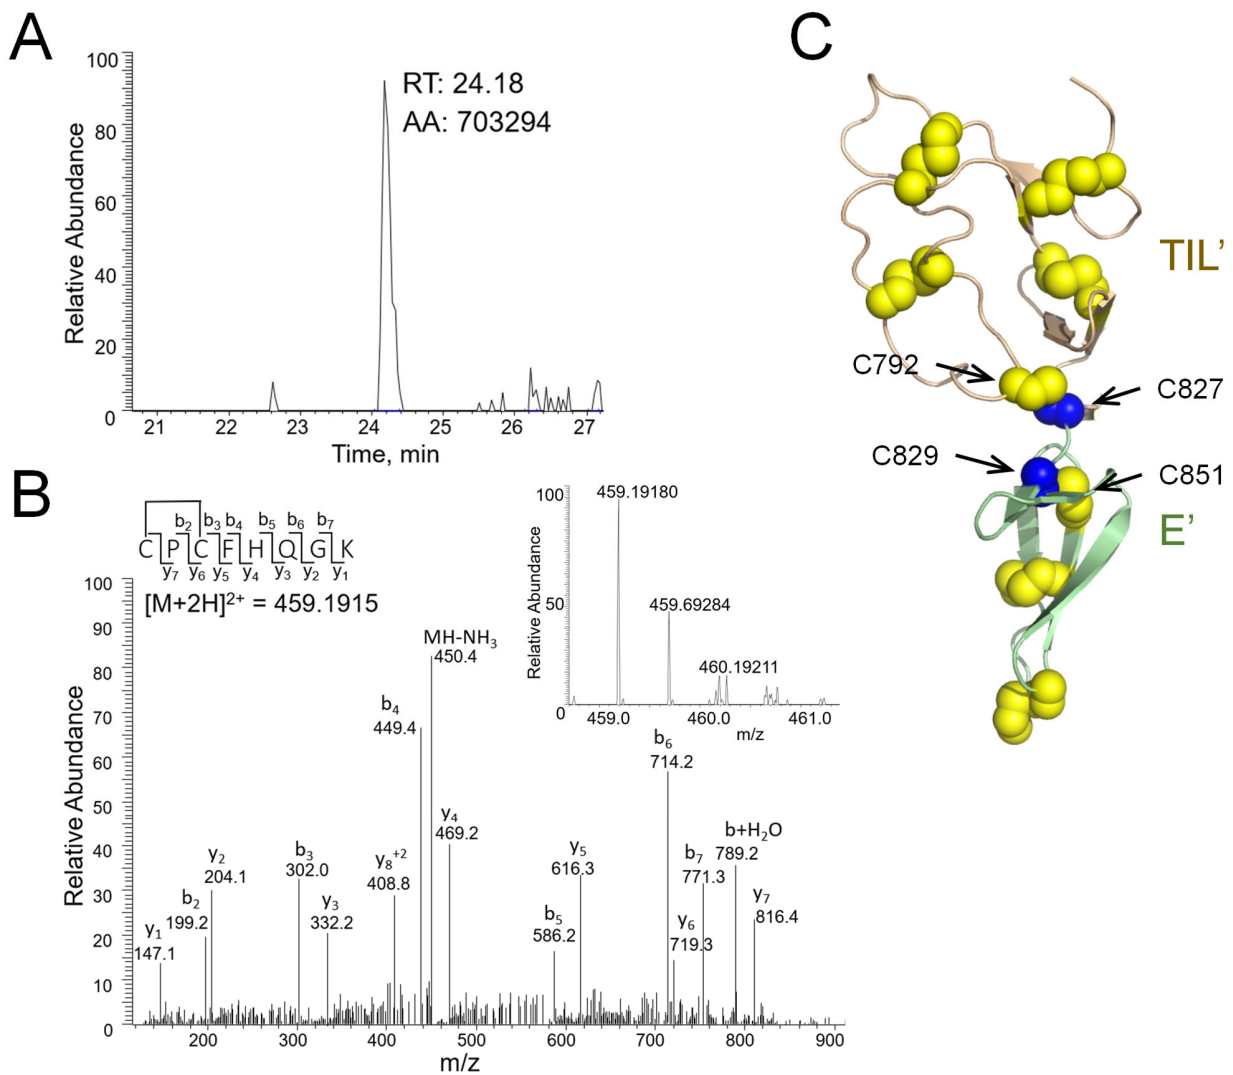

**Figure S6. Identification of the VWF C827-C829 disulfide bond.** **A.** HPLC resolution of the CPCFHQGK peptide containing C827 in the TIL' domain linking C829 in the E' domain in VWF from healthy donor plasma. **B.** Representative tandem mass spectra of the CPCFHQGK peptide. The accurate mass spectrum of the peptide is shown in the inset (observed  $[M+2H]^{2+} = 459.1918$  m/z and expected  $[M+2H]^{2+} = 459.1915$  m/z). **C.** Ribbon representation of the crystal structure of the TIL' (residues 764-827 in wheat) and E' (residues 828-863 in light green) domains of VWF <sup>2</sup> (PDB identifier 6n29). Cysteines are shown as yellow or blue spheres. C792, C827, C829 and C851 are indicated and can bond in three different configurations: C792-C827, C827-C829 (blue spheres) and C829-C851.

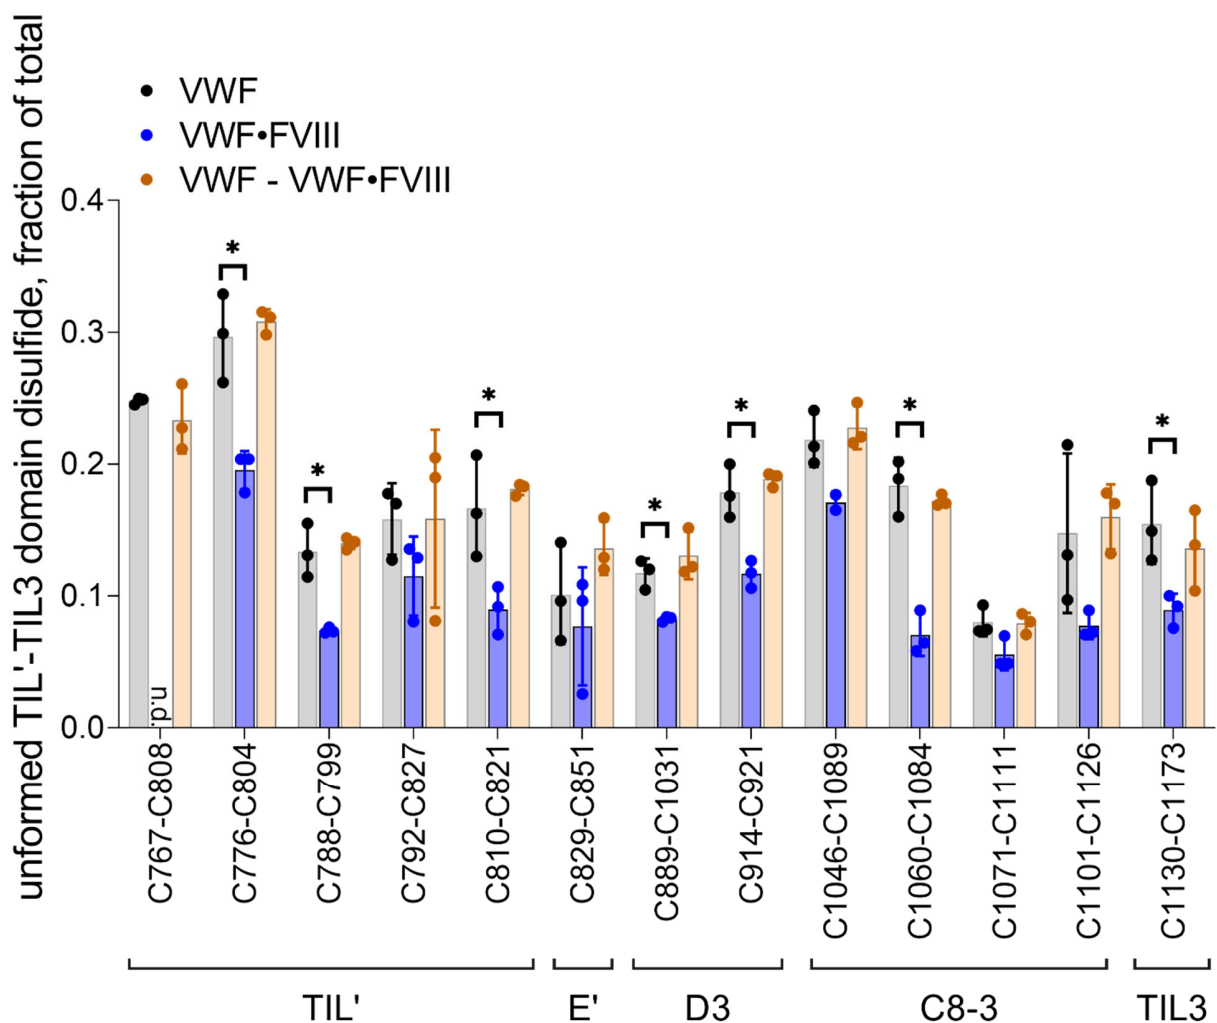

**Figure S7. Binding of pegylated FVIII to VWF results in formation of VWF TIL'-TIL3 disulfides.**

Comparison of the redox states of the VWF TIL'-TIL3 disulfides in three healthy human donors (2 males, 1 female) (black symbols), the plasma VWF bound to pegylated human recombinant full-length FVIII (Adynovate, Takeda, blue symbols) and the unbound VWF in plasma following removal of VWF·FVIII complexes (orange symbols). The bars and errors are mean  $\pm$  SD. Parametric unpaired t test was used to evaluate differences between groups. Significant difference ( $p < 0.05$ ) between VWF and VWF·FVIII groups is indicated by \*. There was no significant difference between the VWF and VWF - VWF·FVIII groups. Peptides that were not resolved in the experiment are indicated as not determined (n.d.).

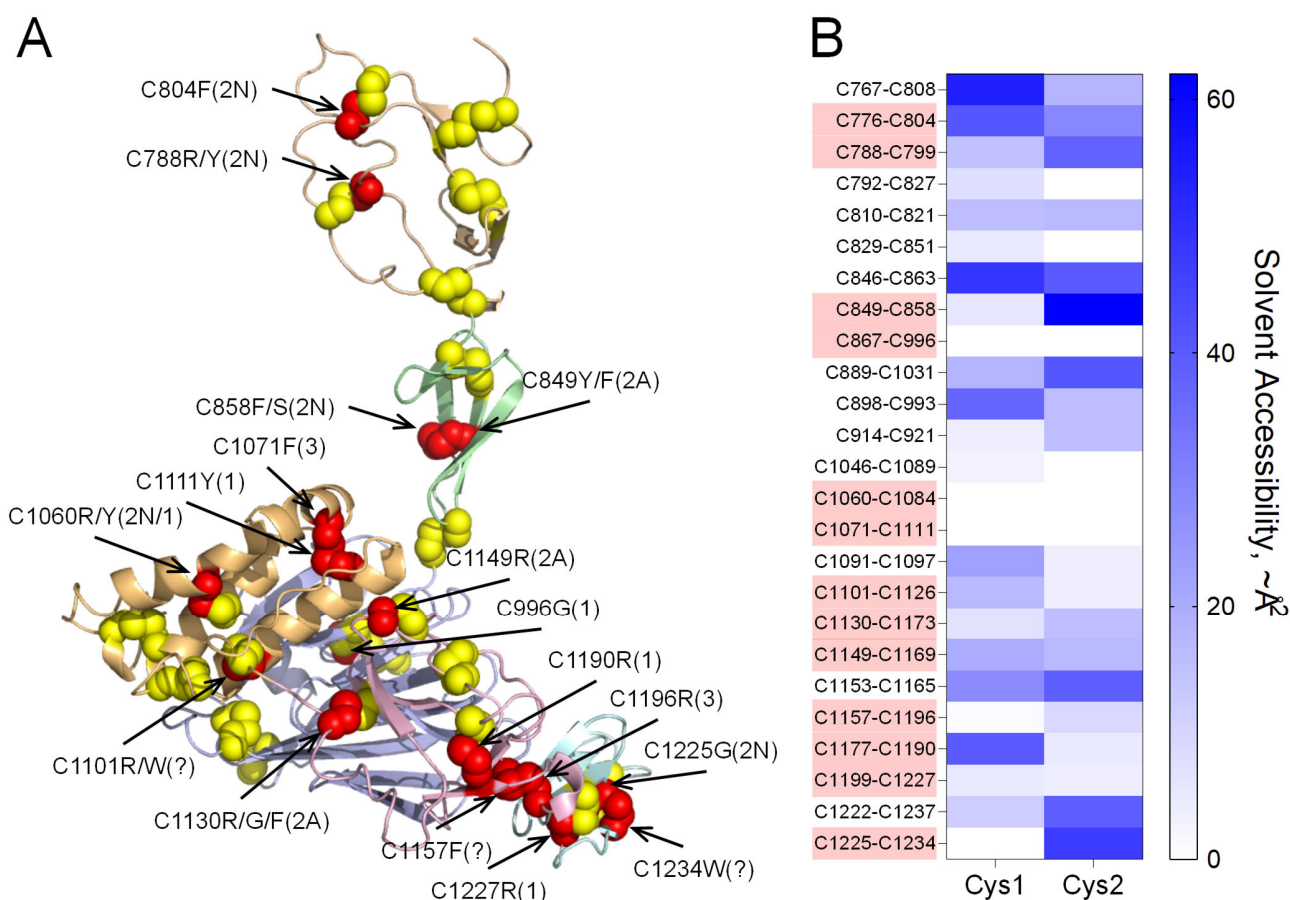

**Figure S8. VWD mutations in disulfide bond cysteines at the FVIII binding site. A.** Ribbon representation of the crystal structure of the TIL' (residues 764-827 in wheat), E' (residues 828-863 in light green), D3 (residues 864-1037 in light blue), C8-3 (residues 1038-1127 in light orange), TIL3 (residues 1128-1196 in pink) and E3 (residues 1197-1252 in cyan) domains of VWF<sup>2</sup> (PDB identifier 6n29). The cysteine residues comprising the 25 disulfide bonds are shown as spheres. Red spheres indicate VWD cysteine mutations that have been identified in patients. The cysteine residue mutation and VWD type is indicated. Mutations listed in the EAHAD von Willebrand Factor Variant Database as of December 20, 2020 are indicated. The C788R/Y, C804F, C858F/S, C1060R/Y and C1225G mutations result in impaired binding of FVIII but not production of VWF, or type 2N VWD. Both the C788R and C1225G mutations have been shown to be type 2N mutations with both reduced secretion and multimerization. Thus, these mutations likely impair protein folding and/or exit from the ER. **B.** Heat map of the solvent accessibility of the 50 VWF disulfide bond cysteines in the TIL'-TIL3 domains. The scale is the solvent accessibility in  $\sim \text{\AA}^2$  derived from DSSP<sup>3</sup> using the PDB identifier 6n29 structure<sup>2</sup>. The TIL'-TIL3 structure crystallized as a dimer and to avoid possible masking of surface exposed cysteines at the dimer interface, chain A of the structure was extracted and analyzed independently. The disulfides highlighted in red are those mutated in VWD and shown in part A.

## References

1. Obeidy P, Wang H, Du M, et al. Molecular Spring Constant Analysis by Biomembrane Force Probe Spectroscopy. *J Vis Exp*. 2021(177).
2. Dong X, Leksa NC, Chhabra ES, et al. The von Willebrand factor D'D3 assembly and structural principles for factor VIII binding and concatemer biogenesis. *Blood*. 2019;133(14):1523-1533.
3. Kabsch W, Sander C. Dictionary of protein secondary structure: pattern recognition of hydrogen-bonded and geometrical features. *Biopolymers*. 1983;22(12):2577-2637.
